# Supplementary material
Source: MDPI journal article supplement (https://www.mdpi.com/2071-1050/13/16/9135)
Supplement: s1 [file s1]

# Efficacy of Hormonal Growth Promoter Implants on the Performance of Grazing Steers of Different Breeds in Southern Chile

M. Jordana Rivero <sup>1,2</sup>, Luis Araya <sup>3</sup>, Marcelo Oyarzo <sup>4</sup>, Andrew S. Cooke <sup>2</sup>, Sarah A. Morgan <sup>2</sup> and Veronica M. Merino <sup>5,\*</sup>

<sup>1</sup> Departamento de Ciencias Agropecuarias y Acuícolas, Facultad de Recursos Naturales, Universidad Católica de Temuco, Temuco 4780000, Chile

<sup>2</sup> Rothamsted Research, North Wyke, Okehampton, Devon EX20 2SB, UK

<sup>3</sup> Fundo “El Toro”, Llanquihue 5610000, Chile

<sup>4</sup> Prodesal Villarrica, Villarrica 4930000, Chile

<sup>5</sup> Faculty of Agriculture, Universidad de Concepción, PO Box 160-C, Concepción 4030000, Chile

\* Correspondence: veronicamerino@udec.cl

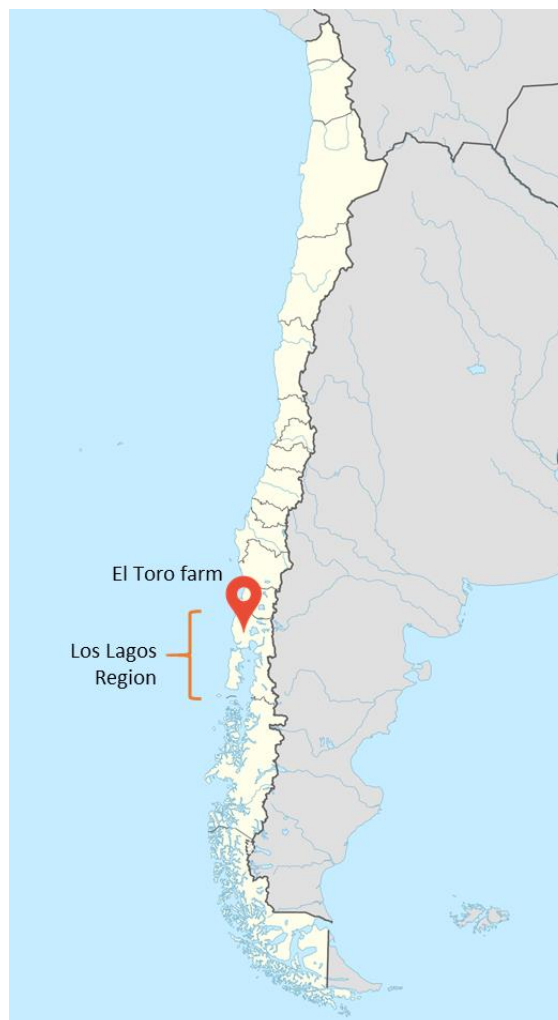

**Supplementary material S1.** Map of Chile with the location of the experimental farm.

## Liveweight (LW, kg) of steers during the experiment

| Breed          | DoB      | Implant Group | Pre-implant phase      |            |            |            | Post-implant phase |            |            |            |
|----------------|----------|---------------|------------------------|------------|------------|------------|--------------------|------------|------------|------------|
|                |          |               | Initial LW pre-implant | LW2        | LW3        | LW4        | LW at implant date | LW6        | LW7        | Final LW   |
|                |          |               | 12/07/2016             | 02/08/2016 | 22/08/2016 | 15/09/2016 | 05/10/2016         | 25/10/2016 | 15/11/2016 | 05/12/2016 |
| Angus          | 11/09/15 | No            | 192                    | 205        | 223        | 261        | 273                | 305        | 329        | 345        |
| Angus          | 15/10/15 | No            | 209                    | 216        | 230        | 253        | 276                | 300        | 333        | 364        |
| Angus          | 13/10/15 | No            | 201                    | 201        | 216        | 231        | 255                | 285        | 313        | 336        |
| Angus          | 22/08/15 | No            | 221                    | 243        | 267        | 303        | 321                | 349        | 380        | 409        |
| Angus          | 22/09/15 | No            | 202                    | 231        | 251        | 292        | 314                | 339        | 369        | 402        |
| Angus          | 17/10/15 | Yes           | 207                    | 227        | 261        | 295        | 319                | 344        | 379        | 405        |
| Angus          | 23/08/15 | Yes           | 179                    | 185        | 211        | 236        | 259                | 293        | 330        | 363        |
| Angus          | 28/08/15 | Yes           | 209                    | 215        | 234        | 267        | 285                | 311        | 350        | 373        |
| Angus          | 15/09/15 | Yes           | 228                    | 238        | 263        | 302        | 333                | 368        | 406        | 438        |
| Angus          | 11/09/15 | Yes           | 213                    | 222        | 246        | 279        | 305                | 343        | 380        | 403        |
| Hereford       | 30/09/15 | No            | 216                    | 221        | 256        | 279        | 310                | 346        | 367        | 399        |
| Hereford       | 30/09/15 | No            | 213                    | 226        | 239        | 277        | 291                | 317        | 348        | 376        |
| Hereford       | 15/09/15 | No            | 195                    | 204        | 228        | 249        | 273                | 307        | 332        | 358        |
| Hereford       | 15/10/15 | No            | 225                    | 232        | 261        | 297        | 321                | 357        | 376        | 413        |
| Hereford       | 30/09/15 | No            | 208                    | 218        | 248        | 280        | 313                | 342        | 371        | 401        |
| Hereford       | 24/08/15 | Yes           | 209                    | 209        | 225        | 251        | 272                | 308        | 338        | 359        |
| Hereford       | 14/09/15 | Yes           | 201                    | 224        | 254        | 268        | 301                | 330        | 367        | 393        |
| Hereford       | 04/08/15 | Yes           | 215                    | 221        | 242        | 282        | 306                | 344        | 376        | 404        |
| Hereford       | 15/09/15 | Yes           | 215                    | 232        | 261        | 298        | 313                | 344        | 380        | 402        |
| Hereford       | 15/10/15 | Yes           | 183                    | 192        | 215        | 252        | 270                | 303        | 339        | 364        |
| Holstein       | 16/09/15 | No            | 241                    | 264        | 301        | 338        | 353                | 386        | 416        | 440        |
| Holstein       | 13/10/15 | No            | 203                    | 215        | 245        | 274        | 297                | 322        | 343        | 367        |
| Holstein       | 27/09/15 | No            | 231                    | 256        | 294        | 328        | 344                | 377        | 409        | 437        |
| Holstein       | 12/08/15 | No            | 248                    | 272        | 311        | 353        | 349                | 387        | 416        | 445        |
| Holstein       | 15/10/15 | No            | 283                    | 314        | 356        | 396        | 423                | 459        | 496        | 510        |
| Holstein       | 14/10/15 | Yes           | 221                    | 240        | 275        | 307        | 323                | 346        | 382        | 404        |
| Holstein       | 15/08/15 | Yes           | 314                    | 338        | 386        | 430        | 458                | 486        | 522        | 548        |
| Holstein       | 05/09/15 | Yes           | 262                    | 292        | 320        | 349        | 367                | 398        | 429        | 450        |
| Holstein       | 14/08/15 | Yes           | 331                    | 353        | 385        | 428        | 445                | 476        | 510        | 540        |
| Holstein       | 07/10/15 | Yes           | 292                    | 316        | 357        | 395        | 415                | 439        | 474        | 494        |
| Overo Colorado | 15/10/15 | No            | 223                    | 235        | 262        | 275        | 305                | 339        | 367        | 390        |
| Overo Colorado | 01/01/16 | No            | 213                    | 224        | 251        | 275        | 286                | 310        | 342        | 369        |
| Overo Colorado | 15/10/15 | No            | 231                    | 232        | 255        | 286        | 299                | 320        | 354        | 377        |
| Overo Colorado | 15/09/15 | No            | 219                    | 226        | 249        | 282        | 297                | 328        | 339        | 358        |
| Overo Colorado | 23/09/15 | No            | 195                    | 220        | 254        | 302        | 328                | 351        | 382        | 417        |
| Overo Colorado | 13/08/15 | Yes           | 177                    | 194        | 218        | 244        | 275                | 309        | 344        | 373        |
| Overo Colorado | 15/08/15 | Yes           | 185                    | 207        | 227        | 256        | 282                | 312        | 350        | 384        |
| Overo Colorado | 15/07/15 | Yes           | 201                    | 221        | 249        | 277        | 304                | 331        | 372        | 400        |
| Overo Colorado | 15/10/15 | Yes           | 218                    | 246        | 278        | 319        | 338                | 374        | 413        | 433        |
| Overo Colorado | 15/09/15 | Yes           | 229                    | 251        | 282        | 323        | 335                | 371        | 401        | 430        |
